# Supplementary material
Source: MDPI journal article supplement (https://www.mdpi.com/2073-4441/10/10/1426)
Supplement: s1 [file s1]

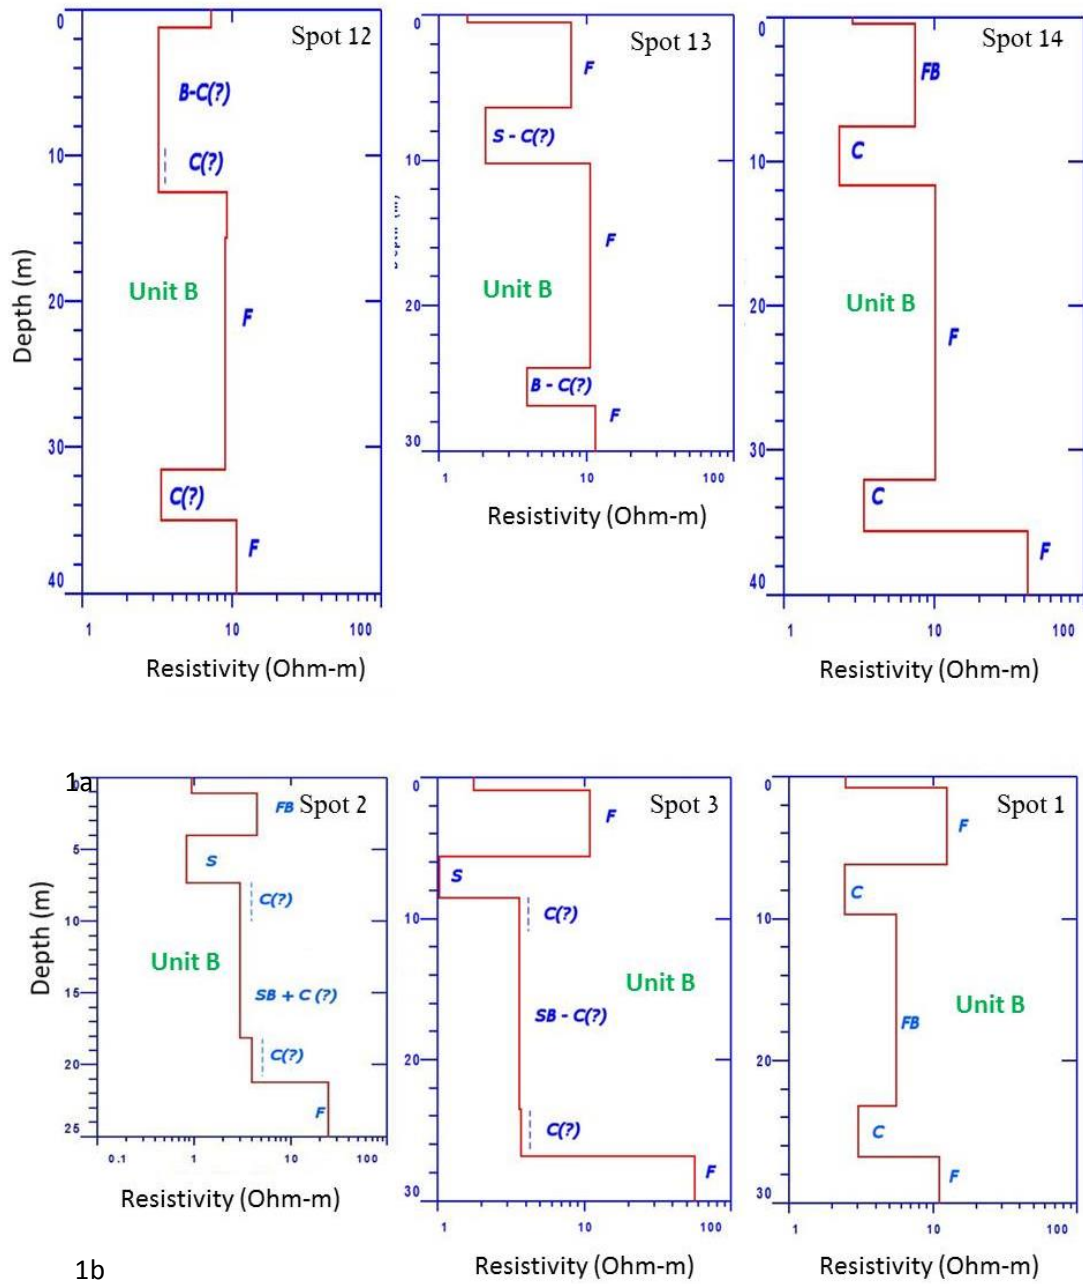

Figure.S1. TDEM resistivity profiles and interpretation in the northern site (1a) and in the southern site (1b) from the west (spots 12 and 2, at shoreline) to the east (spots 1 and 14, 70 m from shoreline), respectively. F- Fresh water, B – Brackish water, FB – fresh-brackish , S – Saline water , C – Clay layer.

| well name | aquifer | level behavior | number of tests | aquifer type | average hydrological conductivity (m/day) |
|-----------|---------|----------------|-----------------|--------------|-------------------------------------------|
| 71-1      | C       | dynamic        | 5               | confined     | <b>66.0</b>                               |
| 71-2      | B       | dynamic        | 5               | confined     | <b>45.4</b>                               |
| 72        | B       | dynamic        | 6               | confined     | <b>40.9</b>                               |
| 73        | B       | dynamic        | 4               | confined     | <b>47.8</b>                               |
| 71-3      | A       | exponential    | 6               | phreatic     | <b>13.2</b>                               |

Table S1 App. Slug test. For more about level behavior type see [Lutski and Shalev \(2010\)](#).

| well name | aquifer | T (m <sup>2</sup> /day) | S       | aquifer  | solution     |
|-----------|---------|-------------------------|---------|----------|--------------|
| 71-1      | C       | 1197                    | 0.00160 | confined | Cooper-jacob |
| 71-2      | B       | 750                     | 0.00012 | confined | Cooper-jacob |
| 72        | B       | 800                     | 0.0001  | confined | Cooper-jacob |

Table S2 App. Interference recovery test

| Slope | A (m <sup>2</sup> ) | V (m <sup>3</sup> ) | v* (m/hr)    | v*    | v corrected | R <sup>2</sup> |
|-------|---------------------|---------------------|--------------|-------|-------------|----------------|
|       |                     |                     | =slope/(A/V) | m/day | m/d         |                |
| 0.82  | 0.88                | 0.11                | 0.10         | 2.36  | 5.9         | 1.00           |

Table S3 App. Horizontal groundwater velocity in well 71-3 which interpreted from Point dilution test by the procedure described in [Ward et al \(1998\)](#).

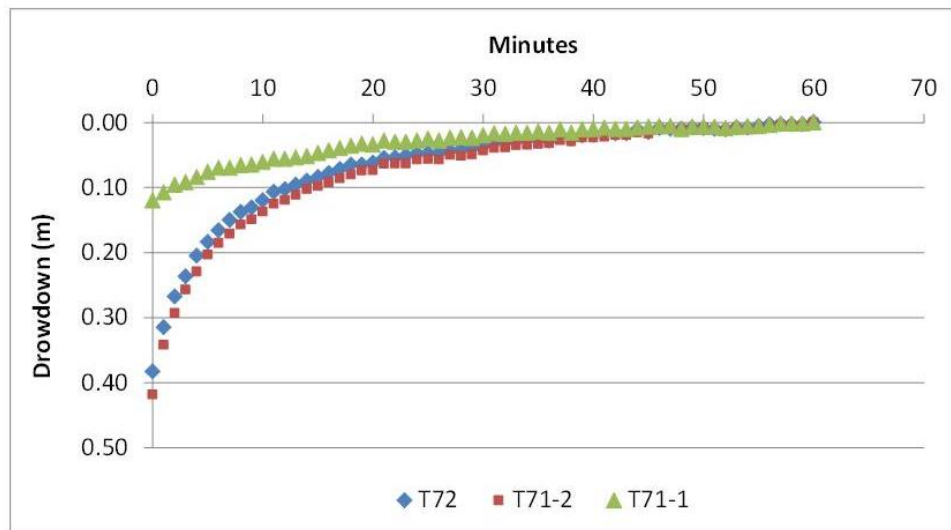

Figure S2 Interference Recovery test in wells 71-2, 71-1 and 72. X – axis is the time after the pumping in well 211 was stopped.

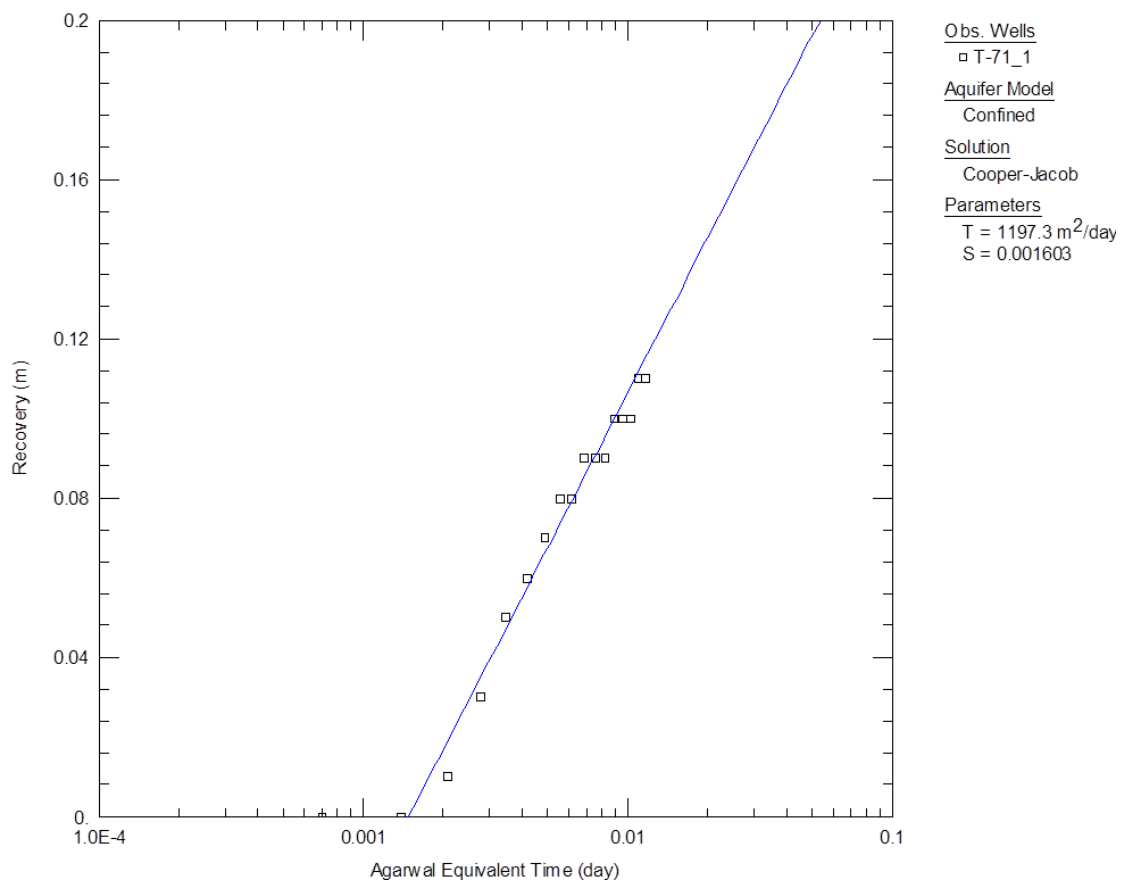

Figure S3. Interpretation of interference recovery test in well 71-1 (unit C).

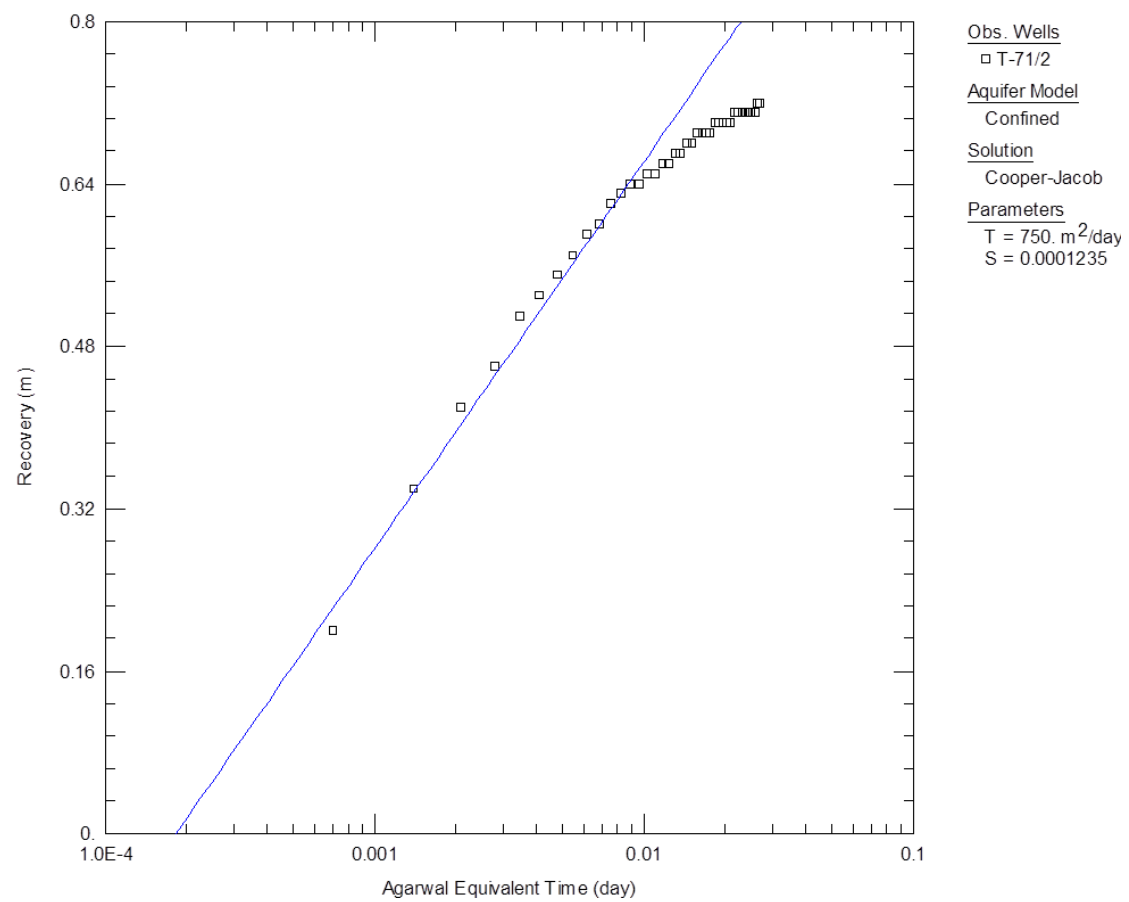

Figure S4. Interpretation of interference recovery test in well 71-2 (unit B).

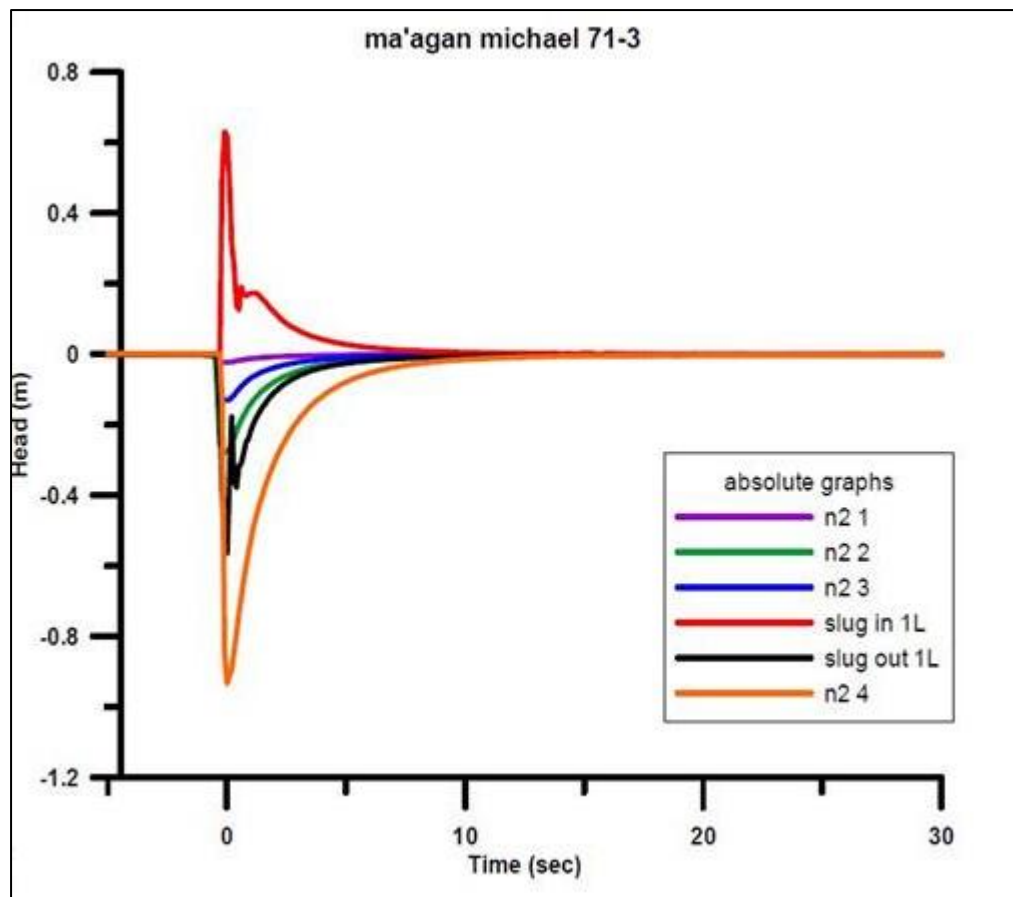

Figure S5. Slug test in well 71-3 (unit A, phreatic). n2 1-4 is for nitrogen injections in different pressure .

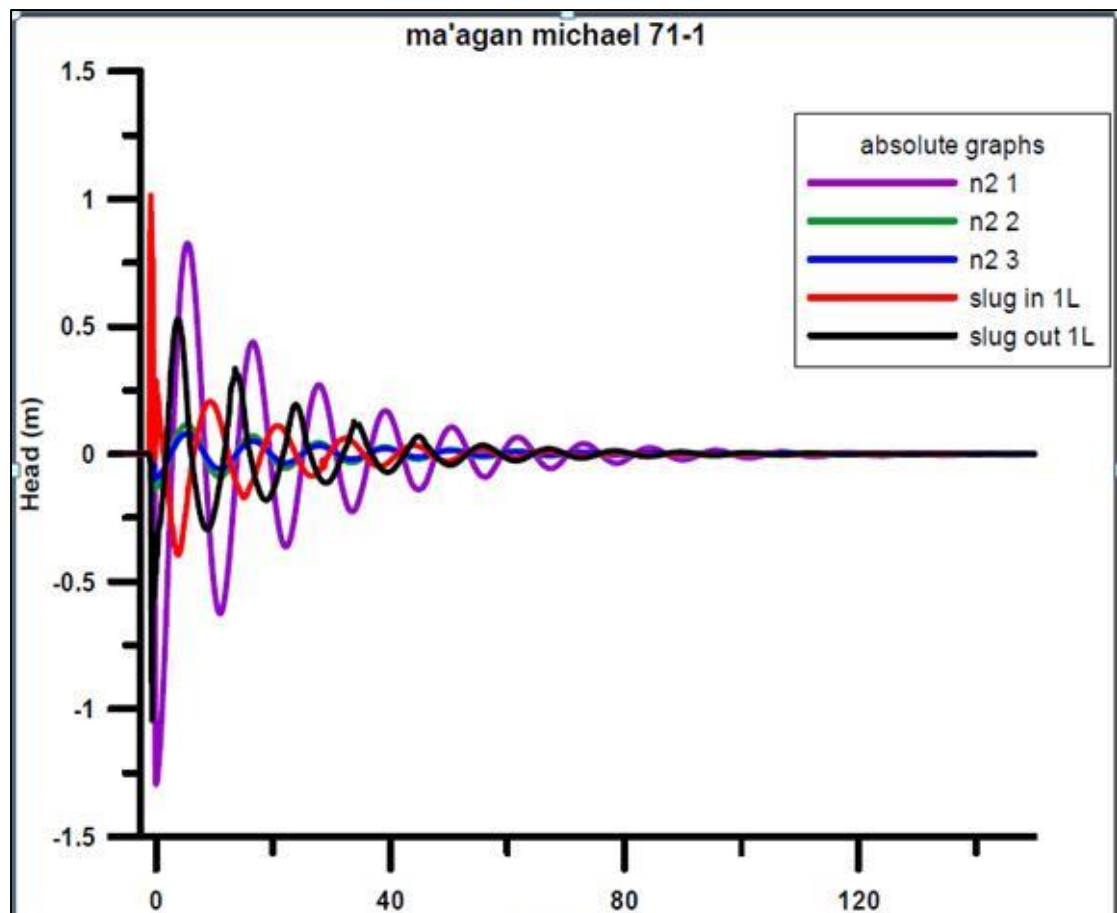

Figure S6 Slug test in well 71-1 (unit C, confined). n2 1-3 is for nitrogen injections in different pressure .

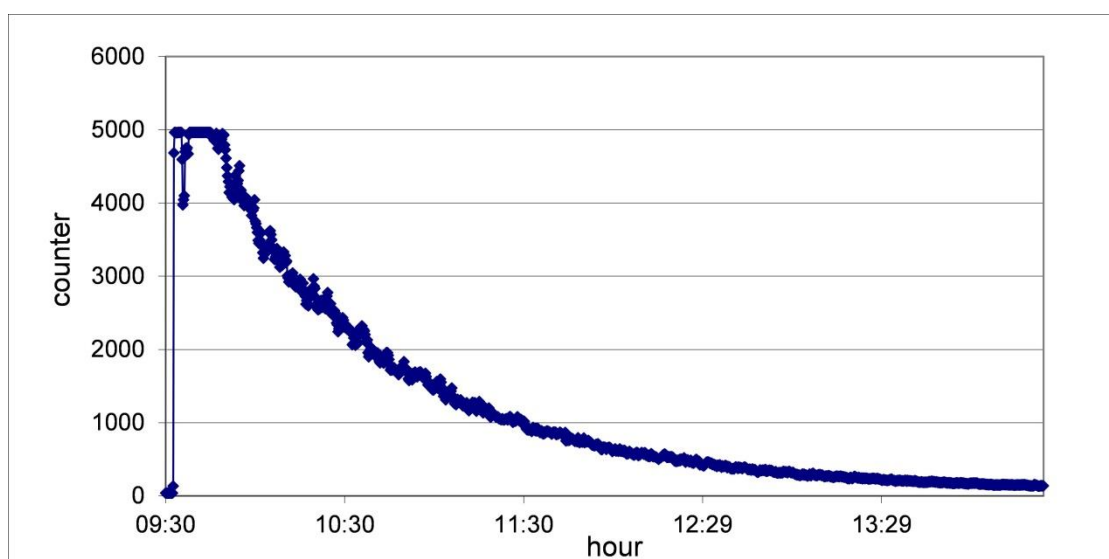

Figure S7 Fluorometer counter after time from injection (hour).

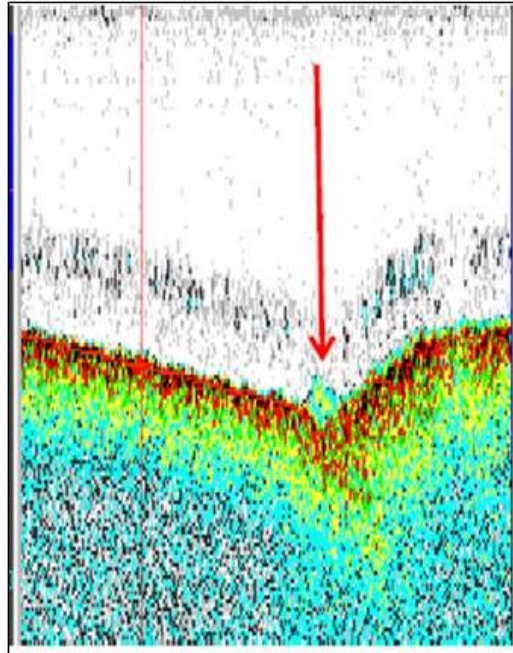

Figure S8 Location of SGD (red arrow) which recognized on line 3 in the chirp survey (see figure 8 ), in a place where the Kurkar rock is exposed.

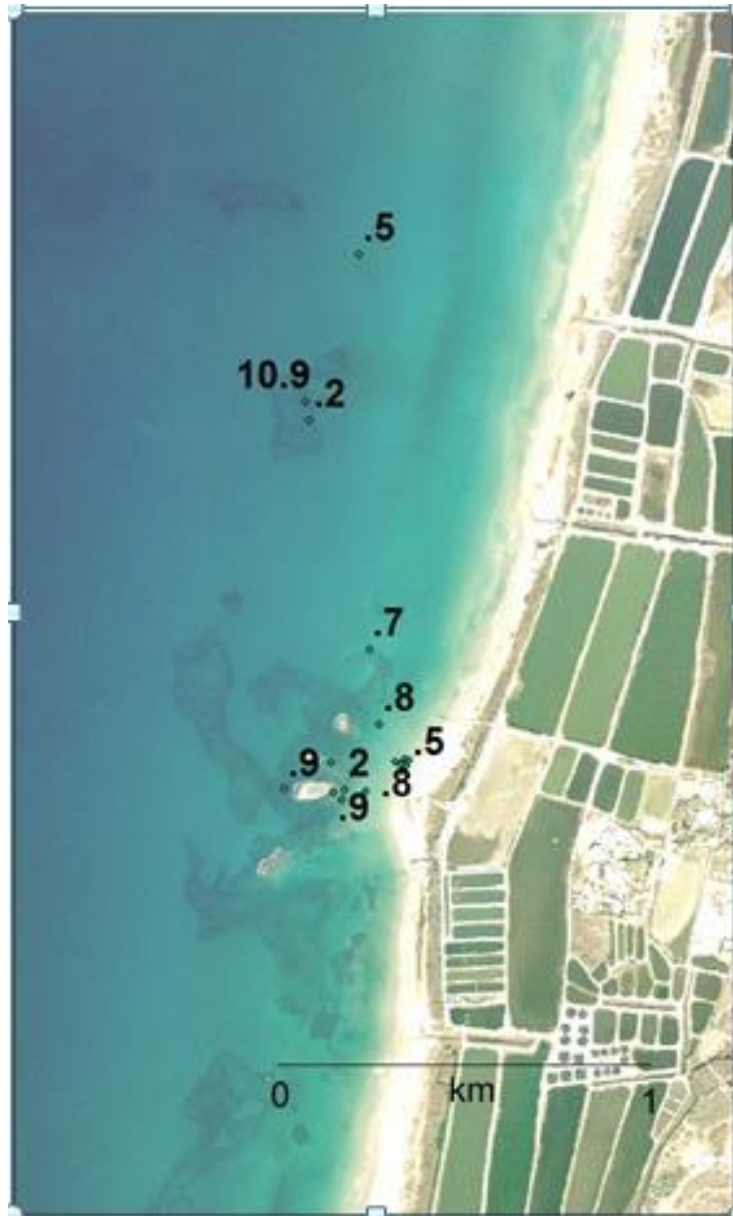

Figure S9 Radon activity (dpm/L) in the shallow sea. High activity (10.9 dpm/L) was measured in the northern area (191087/718969), 700 m from shoreline, where the Kurkar ridge is exposed .
